# Supplementary material for: How Lifestyle Changes during the COVID-19 Global Pandemic Affected the Pattern and Symptoms of the Menstrual Cycle
Source: MDPI journal article supplement (doi:10.3390/ijerph192013622), 2022-10-20
Supplement: s1 [file s1]

**Supplementary Table S1.** Binary logistic regression for those participants who reported a change in their menstrual cycle length (n=295) to determine any associations with an increase or decrease in exercise behaviours

| Exercise                                                                                        | Answer    | P Value | Odds ratio | 95% CI Lower | 95% CI Upper |
|-------------------------------------------------------------------------------------------------|-----------|---------|------------|--------------|--------------|
| Sports-specific skill training (ie practice of skills associated with your sport)               | Decreased | 0.354   | 0.735      | 0.383        | 1.410        |
|                                                                                                 | Increased | 0.200   | 0.669      | 0.362        | 1.237        |
| Aerobic endurance training (i.e. continuous running/cycling/rowing)                             | Decreased | 0.095   | 0.482      | 0.205        | 1.135        |
|                                                                                                 | Increased | 0.589   | 1.159      | 0.678        | 1.980        |
| Aerobic-based interval training (i.e. repetitions >2 min duration, short recoveries)            | Decreased | 0.789   | 0.915      | 0.476        | 1.757        |
|                                                                                                 | Increased | 0.755   | 0.904      | 0.480        | 1.703        |
| High-intensity interval and sprint training (i.e. repetitions <2 min duration, long recoveries) | Decreased | 0.793   | 0.916      | 0.474        | 1.768        |
|                                                                                                 | Increased | 0.654   | 1.170      | 0.588        | 2.328        |
| Multi-joint resistance training (i.e. barbell, dumbbell, kettlebell, machine exercises)         | Decreased | 0.822   | 1.083      | 0.543        | 2.159        |
|                                                                                                 | Increased | 0.122   | 0.558      | 0.267        | 1.169        |
| Single-joint resistance training (e.g. calf raises, theraband exercises, lateral raise)         | Decreased | 0.654   | 0.862      | 0.450        | 1.652        |
|                                                                                                 | Increased | 0.996   | 0.766      | 0.391        | 1.497        |
| Plyometrics (i.e. jumping, hopping, skipping, bounding)                                         | Decreased | 0.622   | 0.863      | 0.481        | 1.549        |
|                                                                                                 | Increased | 0.988   | 0.995      | 0.507        | 1.952        |

|                                                                                         |           |       |       |       |       |
|-----------------------------------------------------------------------------------------|-----------|-------|-------|-------|-------|
| Body weight conditioning<br>(e.g. press-ups, burpees,<br>high knees, star jumps)        | Decreased | 0.201 | 1.624 | 0.772 | 3.415 |
|                                                                                         | Increased | 0.345 | 1.356 | 0.720 | 2.555 |
| Core stability/Pilates<br>(exercises specifically for<br>the trunk/abdominal<br>region) | Decreased | 0.875 | 0.942 | 0.444 | 1.996 |
|                                                                                         | Increased | 0.470 | 0.815 | 0.469 | 1.418 |
| Static stretching                                                                       | Decreased | 0.460 | 0.785 | 0.414 | 1.490 |
|                                                                                         | Increased | 0.723 | 0.917 | 0.566 | 1.484 |

**Supplementary Table S2.** Binary logistic regression for those participants who reported a change in their menstrual cycle length (n=295) to determine any associations with an increase or decrease in dietary behaviours

| Exercise                                                        | Answer    | P Value      | Odds ratio | 95% CI Lower | 95% CI Upper |
|-----------------------------------------------------------------|-----------|--------------|------------|--------------|--------------|
| Eating fruits and vegetables                                    | Decreased | 0.097        | 4.387      | 0.766        | 25.154       |
|                                                                 | Increased | 0.901        | 1.075      | 0.342        | 3.380        |
| Eating dairy products                                           | Decreased | 0.730        | 1.440      | 0.182        | 11.401       |
|                                                                 | Increased | <b>0.025</b> | 0.936      | 0.238        | 3.676        |
| Eating red meat e.g. beef, lamb, pork (protein)                 | Decreased | 0.085        | 0.076      | 0.004        | 1.425        |
|                                                                 | Increased | 0.477        | 1.810      | 0.353        | 9.280        |
| Eating white meat e.g. chicken, turkey                          | Decreased | <b>0.003</b> | 160.632    | 5.553        | 4646.444     |
|                                                                 | Increased | <b>0.035</b> | 16.473     | 2.342        | 115.876      |
| Eating processed meat e.g. bacon, sausages, ham                 | Decreased | <b>0.001</b> | 43.038     | 4.301        | 430.621      |
|                                                                 | Increased | <b>0.002</b> | 13.702     | 2.614        | 71.837       |
| Eating fish                                                     | Decreased | 0.153        | 0.255      | 0.039        | 1.664        |
|                                                                 | Increased | 0.499        | 0.588      | 0.126        | 2.745        |
| Eating grains/carbohydrates (for example rice, pasta, potatoes) | Decreased | 1.00         | 0.0        | 0.0          | 0.0          |
|                                                                 | Increased | 0.028        | 0.232      | 0.063        | 0.852        |
| Eating healthy fats (nuts, seeds, avocados, nut butters, oils)  | Decreased | 0.430        | 0.103      | 0.000        | 28.959       |
|                                                                 | Increased | 0.906        | 1.081      | 0.294        | 3.970        |
| Eating less healthy/processed foods                             | Decreased | <b>0.035</b> | 0.032      | 0.001        | 0.779        |
|                                                                 | Increased | 0.124        | 0.376      | 0.108        | 1.306        |

|                                       |           |       |       |       |        |
|---------------------------------------|-----------|-------|-------|-------|--------|
| (cakes, sweets, biscuits, chocolates) |           |       |       |       |        |
| Eating more home baked/cooked foods   | Decreased | 0.583 | 0.439 | 0.023 | 8.332  |
|                                       | Increased | 0.321 | 0.545 | 0.164 | 1.807  |
| Eating more take outs                 | Decreased | 0.678 | 1.555 | 0.193 | 12.515 |
|                                       | Increased | 0.971 | 0.967 | 0.161 | 5.812  |
| Drinking Alcohol                      | Decreased | 0.953 | 0.956 | 0.217 | 4.206  |
|                                       | Increased | 0.084 | 0.303 | 0.078 | 1.176  |

**Supplementary Table S3.** Chi Square analysis to determine any significant difference in participants who reported a change in cycle length between a change in menstrual cycle symptoms. Odds ratio to determine the likelihood of an increase in symptom causing a change in menstrual cycle length

| Symptom              | Change in Symptom (n/%) | No change in Symptom (n/%) | Chi Squared | P value | Odds ratio | 95% Confidence Intervals |       |
|----------------------|-------------------------|----------------------------|-------------|---------|------------|--------------------------|-------|
|                      |                         |                            |             |         |            | Lower                    | Upper |
| Lower Back pain      | 210/71.9                | 85/28.1                    | 0.457       | 0.499   | 0.916      | 0.712                    | 1.180 |
| Headaches            | 114/38.6                | 181/61.4                   | 0.214       | 0.643   | 1.052      | 0.849                    | 1.303 |
| Nausea/Vomiting      | 47/15.9                 | 248/84.1                   | 0.117       | 0.896   | 1.026      | 0.698                    | 1.507 |
| Diarrhoea            | 62/21.0                 | 233/79.0                   | 0.076       | 0.783   | 1.047      | 0.755                    | 1.452 |
| Constipation         | 54/18.3                 | 241/81.7                   | 0.001       | 0.970   | 1.007      | 0.708                    | 1.431 |
| Dizzy/light headed   | 76/25.8                 | 219/74.2                   | 0.531       | 0.466   | 1.115      | 0.832                    | 1.495 |
| Bloating             | 110/37.3                | 185/62.7                   | 0.021       | 0.886   | 0.984      | 0.795                    | 1.219 |
| Weight gain          | 113/38.3                | 182/61.7                   | 0.126       | 0.722   | 0.963      | 0.783                    | 1.185 |
| Water retention      | 81/27.5                 | 214/72.5                   | 0.022       | 0.881   | 1.021      | 0.778                    | 1.340 |
| Tiredness/Fatigue    | 188/63.7                | 107/36.3                   | 0.066       | 0.797   | 0.984      | 0.869                    | 1.114 |
| Lack of coordination | 64/21.7                 | 231/78.3                   | 0.221       | 0.639   | 1.081      | 0.782                    | 1.494 |
| Sleep disruption     | 149/50.5                | 146/49.5                   | 1.648       | 0.199   | 0.901      | 0.769                    | 1.056 |
| Hot flushes/sweating | 70/23.7                 | 225/76.3                   | 0.005       | 0.946   | 1.010      | 0.749                    | 1.362 |

|                        |          |          |       |              |       |       |       |
|------------------------|----------|----------|-------|--------------|-------|-------|-------|
| Breast pain/tenderness | 106/35.9 | 189/64.1 | 0.207 | 0.649        | 1.054 | 0.840 | 1.322 |
| Cravings               | 129/43.7 | 166/56.3 | 0.049 | 0.825        | 1.022 | 0.845 | 1.236 |
| Reduced appetite       | 241/81.7 | 54/18.3  | 0.991 | 0.320        | 1.208 | 0.831 | 1.755 |
| Flooding/leaking       | 76/25.7  | 219/74.3 | 1.887 | 0.170        | 1.237 | 0.912 | 1.677 |
| Blood clots            | 226/76.6 | 69/23.4  | 0.527 | 0.468        | 1.123 | 0.821 | 1.535 |
| Mood changes           | 170/57.6 | 125/42.4 | 0.537 | 0.464        | 1.056 | 0.912 | 1.224 |
| Feeling irritable      | 188/63.7 | 107/36.3 | 0.154 | 0.694        | 1.026 | 0.903 | 1.166 |
| Feeling emotional      | 205/69.5 | 90/30.5  | 1.195 | 0.274        | 1.067 | 0.950 | 1.198 |
| Feeling worried        | 188/63.7 | 107/36.3 | 0.726 | 0.394        | 1.058 | 0.929 | 1.206 |
| Feeling distracted     | 174/54.0 | 121/46.0 | 0.487 | 0.485        | 1.052 | 0.912 | 1.214 |
| Reduced concentration  | 184/62.4 | 111/37.6 | 1.787 | 1.181        | 1.092 | 0.957 | 1.260 |
| Lack of motivation     | 202/68.5 | 93/31.5  | 2.786 | 0.095        | 1.109 | 0.981 | 1.254 |
| Lack of focus          | 181/61.4 | 114/38.6 | 4.313 | <b>0.038</b> | 1.165 | 1.007 | 1.348 |
| Reduced sex drive      | 88/29.8  | 207/70.2 | 0.136 | 0.712        | 1.050 | 0.810 | 1.361 |
| Increased sex drive    | 80/27.1  | 215/72.9 | 0.004 | 0.952        | 1.008 | 0.767 | 1.325 |

**Supplementary Table S4.** Chi Square analysis to determine any significant difference in participants who reported a change in cycle length and a high stress (likert scale 5-7) and low stress (likert scale 1-4). Odds ratio to determine the likelihood of a high stress causing a change in menstrual cycle length

| Symptom                                                                                              | High stress (n/%) | Low stress (n/%) | Chi Squared | P value | Odds ratio | 95% Confidence Intervals |       |
|------------------------------------------------------------------------------------------------------|-------------------|------------------|-------------|---------|------------|--------------------------|-------|
|                                                                                                      |                   |                  |             |         |            | Lower                    | Upper |
| Please highlight how worries you are about job security during COVID-19 and moving forward from here | 57/19.3           | 238/80.7         | 0.012       | 0.911   | 0.981      | 0.700                    | 1.374 |
| Please highlight how worried you                                                                     | 65/22.0           | 230/78.0         | 2.557       | 0.110   | 1.322      | 0.937                    | 1.866 |

|                                                                                             |           |          |       |       |       |       |       |
|---------------------------------------------------------------------------------------------|-----------|----------|-------|-------|-------|-------|-------|
| are about personal finances during the COVID-19 pandemic                                    |           |          |       |       |       |       |       |
| If your cycle length has changed please highlight how stressed you are about these changes  | 40.0/13.6 | 255/86.4 | 0.055 | 0.813 | 1.053 | 0.688 | 1.612 |
| Please highlight how worried you are about your own health during the current pandemic      | 57/19.3   | 238/80.7 | 0.012 | 0.911 | 0.981 | 0.700 | 1.374 |
| Please highlight how worried you are about your families health during the current pandemic | 152/51.5  | 143/48.5 | 0.033 | 0.856 | 1.015 | 0.863 | 1.194 |

**Supplementary Table S5.** Chi Square analysis to determine any significant difference in participants who reported a change in cycle length between a change in menstrual cycle symptoms. Odds ratio to determine the likelihood of an increase in symptom causing a change in menstrual cycle length. Active (A) and Elite (B) Participants.

**A**

| Symptom                | Change in Symptom (n/%) | No change in Symptom (n/%) | Chi Squared | P value | Odds ratio | 95% Confidence Intervals |       |
|------------------------|-------------------------|----------------------------|-------------|---------|------------|--------------------------|-------|
|                        |                         |                            |             |         |            | Lower                    | Upper |
| Lower Back pain        | 78/31.8                 | 167/68.2                   | 0.041       | 0.840   | 1.028      | 0.787                    | 1.343 |
| Headaches              | 101/41.2                | 144/58.8                   | 0.643       | 0.423   | 1.096      | 0.875                    | 1.372 |
| Nausea/Vomiting        | 39/15.9                 | 206/84.1                   | 0.157       | 0.692   | 1.090      | 0.711                    | 1.671 |
| Diarrhoea              | 52/21.2                 | 193/78.8                   | 0.223       | 0.637   | 1.090      | 0.762                    | 1.560 |
| Constipation           | 48/19.6                 | 197/80.4                   | 0.024       | 0.877   | 1.0303     | 0.711                    | 1.490 |
| Dizzy/light headed     | 60/24.5                 | 185/75.5                   | 0.142       | 0.706   | 1.064      | 0.770                    | 1.472 |
| Bloating               | 88/35.9                 | 157/64.1                   | 0.079       | 0.778   | 0.966      | 0.762                    | 1.226 |
| Weight gain            | 98/40.0                 | 147/60.0                   | 0.024       | 0.876   | 0.983      | 0.789                    | 1.224 |
| Water retention        | 66/26.9                 | 179/73.1                   | 0.009       | 0.924   | 1.015      | 0.752                    | 1.369 |
| Tiredness/Fatigue      | 157/64.1                | 88/35.9                    | 0.272       | 0.602   | 0.965      | 0.846                    | 1.102 |
| Lack of coordination   | 54/22.0                 | 191/78.0                   | 0.200       | 0.655   | 1.083      | 0.764                    | 1.536 |
| Sleep disruption       | 119/48.6                | 126/51.4                   | 1.161       | 0.281   | 0.907      | 0.760                    | 1.083 |
| Hot flushes/sweating   | 59/24.1                 | 186/75.9                   | 0.727       | 0.394   | 1.158      | 0.826                    | 1.623 |
| Breast pain/tenderness | 89/36.3                 | 156/63.7                   | 0.667       | 0.414   | 1.109      | 0.864                    | 1.424 |
| Cravings               | 105/42.9                | 140/57.1                   | 0.007       | 0.934   | 1.009      | 0.818                    | 1.244 |
| Reduced appetite       | 40/16.3                 | 205/83.7                   | 0.866       | 0.352   | 1.230      | 0.794                    | 1.905 |
| Flooding/leaking       | 64/26.1                 | 181/73.9                   | 1.547       | 0.214   | 1.230      | 0.886                    | 1.707 |
| Blood clots            | 58/23.7                 | 187/76.3                   | 0.081       | 0.776   | 1.049      | 0.754                    | 1.459 |
| Mood changes           | 114/58.8                | 101/41.2                   | 1.539       | 0.215   | 1.107      | 0.942                    | 1.301 |
| Feeling irritable      | 160/65.3                | 85/34.7                    | 0.434       | 0.510   | 1.047      | 0.913                    | 1.200 |
| Feeling emotional      | 175/71.4                | 70/28.6                    | 2.216       | 0.137   | 1.098      | 0.970                    | 1.243 |

|                       |          |          |       |              |       |       |       |
|-----------------------|----------|----------|-------|--------------|-------|-------|-------|
| Feeling worried       | 160/65.3 | 85/34.7  | 0.434 | 0.510        | 1.047 | 0.913 | 1.200 |
| Feeling distracted    | 148/60.4 | 97/39.6  | 0.689 | 0.406        | 1.067 | 0.916 | 1.242 |
| Reduced concentration | 155/63.3 | 90/36.7  | 1.385 | 0.239        | 1.091 | 0.943 | 1.264 |
| Lack of motivation    | 167/68.2 | 78/31.8  | 0.515 | 0.473        | 1.048 | 0.922 | 1.191 |
| Lack of focus         | 155/63.3 | 90/36.7  | 4.583 | <b>0.032</b> | 1.182 | 1.013 | 1.379 |
| Reduced sex drive     | 75/30.6  | 170/69.4 | 0.297 | 0.586        | 1.081 | 0.817 | 1.431 |
| Increased sex drive   | 65/26.5  | 180/73.5 | 0.108 | 0.743        | 0.952 | 0.702 | 1.279 |

## B

| Symptom                | Change in Symptom (n/%) | No change in Symptom (n/%) | Chi Squared | P value      | Odds ratio | 95% Confidence Intervals |       |
|------------------------|-------------------------|----------------------------|-------------|--------------|------------|--------------------------|-------|
|                        |                         |                            |             |              |            | Lower                    | Upper |
| Lower Back pain        | 7/14.0                  | 43/86.0                    | 5.022       | <b>0.025</b> | 0.409      | 0.181                    | 0.926 |
| Headaches              | 13/26.0                 | 37/74.0                    | 0.330       | 0.565        | 0.823      | 0.425                    | 1.596 |
| Nausea/Vomiting        | 8/16.0                  | 42/84.0                    | 0.371       | 0.543        | 0.760      | 0.314                    | 1.841 |
| Diarrhoea              | 10/20                   | 40/80                      | 0.173       | 0.677        | 0.844      | 0.381                    | 1.871 |
| Constipation           | 6/12                    | 44/88.0                    | 0.026       | 0.871        | 0.912      | 0.301                    | 2.765 |
| Dizzy/light headed     | 16/32.0                 | 34/68.0                    | 0.734       | 0.392        | 1.351      | 0.671                    | 2.719 |
| Bloating               | 22/44.0                 | 28/56.0                    | 0.032       | 0.859        | 1.045      | 0.642                    | 1.700 |
| Weight gain            | 15/30.0                 | 35/70.0                    | 0.176       | 0.674        | 0.877      | 0.476                    | 1.616 |
| Water retention        | 15/30.0                 | 35/70.0                    | 0.011       | 0.915        | 1.036      | 0.539                    | 1.993 |
| Tiredness/Fatigue      | 31/62.0                 | 19/38.0                    | 0.405       | 0.524        | 1.122      | 0.783                    | 1.607 |
| Lack of coordination   | 10/20.0                 | 40/80.0                    | 0.035       | 0.853        | 1.086      | 0.455                    | 2.589 |
| Sleep disruption       | 27/54.0                 | 23/46.0                    | 0.743       | 0.389        | 0.855      | 0.601                    | 1.217 |
| Hot flushes/sweating   | 11/22.0                 | 39/78.0                    | 3.167       | 0.075        | 0.557      | 0.290                    | 1.072 |
| Breast pain/tenderness | 17/34.0                 | 33/66.0                    | 0.605       | 0.437        | 0.808      | 0.472                    | 1.381 |
| Cravings               | 24/48.0                 | 26/52.0                    | 0.092       | 0.761        | 1.073      | 0.680                    | 1.693 |



|                       |         |         |       |              |       |       |       |
|-----------------------|---------|---------|-------|--------------|-------|-------|-------|
| Reduced appetite      | 14/28.0 | 36/72.0 | 0.031 | 0.861        | 1.064 | 0.532 | 2.128 |
| Flooding/leaking      | 12/24.0 | 38/76.0 | 0.397 | 0.529        | 1.303 | 0.567 | 2.992 |
| Blood clots           | 11/22.0 | 39/78.0 | 2.010 | 0.156        | 2.090 | 0.721 | 6.055 |
| Mood changes          | 26/52.0 | 24/48.0 | 1.096 | 0.295        | 0.823 | 0.574 | 1.181 |
| Feeling irritable     | 28/58.0 | 22/44.0 | 0.182 | 0.670        | 0.925 | 0.648 | 1.320 |
| Feeling emotional     | 30/60.0 | 20/40.0 | 0.309 | 0.578        | 0.912 | 0.661 | 1.259 |
| Feeling worried       | 28/56.0 | 22/44.0 | 0.645 | 0.422        | 1.182 | 0.780 | 1.791 |
| Feeling distracted    | 26/52.0 | 24/48.0 | 0.003 | 0.953        | 0.988 | 0.661 | 1.477 |
| Reduced concentration | 29/58.0 | 21/42.0 | 0.557 | 0.455        | 1.160 | 0.781 | 1.723 |
| Lack of motivation    | 35/70.0 | 15/30.0 | 6.895 | <b>0.009</b> | 1.663 | 1.098 | 2.517 |
| Lack of focus         | 26/52.0 | 24/48.0 | 0.185 | 0.667        | 1.098 | 0.715 | 1.684 |
| Reduced sex drive     | 13/26.0 | 37/74.0 | 0.095 | 0.758        | 0.898 | 0.454 | 1.779 |
| Increased sex drive   | 15/30.0 | 35/70.0 | 0.895 | 0.344        | 1.425 | 0.675 | 3.008 |
